# Supplementary material for: Modeling driver cells in developing neuronal networks
Source: PLOS journal article supplement (doi:10.1371/journal.pcbi.1006551), 2018-11-02
Supplement: S18 (10.1371/journal.pcbi.1006551.s018) [file journal.pcbi.1006551.s018]

| Main Route                         |                 | Secondary Route                    |                 |
|------------------------------------|-----------------|------------------------------------|-----------------|
| Firing Neurons                     | $\Delta T$ (ms) | Firing Neurons                     | $\Delta T$ (ms) |
| $eh_1 \rightarrow ih_1$            | $3.4 \pm 0.2$   | $eh_1 \rightarrow ih_1$            | $3.3 \pm 0.1$   |
| $ih_1 \rightarrow ih_2$            | $7 \pm 2$       | $ih_1 \rightarrow ih_2$            | $9 \pm 4$       |
| $ih_2 \rightarrow eh_2$            | $37 \pm 2$      | $ih_2 \rightarrow eh_2$            | $33 \pm 4$      |
| $eh_2 \rightarrow eh_1^*$          | $5 \pm 2$       | $eh_2 \rightarrow (eh_3 - eh_4)$   | $6.6 \pm 0.6$   |
| $eh_1^* \rightarrow (eh_3 - eh_4)$ | $1.5 \pm 1.0$   | $(eh_3 - eh_4) \rightarrow eh_1^*$ | $0.2 \pm 0.2$   |

**Table 1. Model - Routes leading to PBs** Spike time delays  $\Delta T$  between two successive firing of the neurons forming the functional clique along the main and secondary route leading to bursting. Neurons  $eh_3$  and  $eh_4$  are assumed to fire essentially at the same time, since  $eh_4$  fires almost immediately after  $eh_3$  within  $0.03 - 0.04$  ms. Notice that  $eh_1$  is the only driver hub cell firing twice before a PB: the two routes could be distinguished by the time occurrence of the second spike of  $eh_1$  and this event is denoted by an asterisk in the table. The arrows indicate the order of firing in the sequence.
